# Supplementary material
Source: Elsevier journal article supplement (https://comptes-rendus.academie-sciences.fr/chimie/article/10.1016/j.crci.2010.06.017/file/attach/mmc3.pdf)

# checkCIF/PLATON report

No syntax errors found. CIF dictionary Interpreting this report

## Datablock: dl205b

---

Bond precision: C-C = 0.0041 Å Wavelength=0.71073

Cell: a=10.4930(4) b=18.9540(9) c=14.2810(6)  
alpha=90 beta=100.992(4) gamma=90

Temperature: 180 K

|                | Calculated                | Reported                  |
|----------------|---------------------------|---------------------------|
| Volume         | 2788.2(2)                 | 2788.2(2)                 |
| Space group    | P 21/n                    | P 21/n                    |
| Hall group     | -P 2yn                    | -P 2yn                    |
| Moiety formula | C25 H30 N2 P, C H2 Cl2, I | C25 H30 N2 P, C H2 Cl2, I |
| Sum formula    | C26 H32 Cl2 I N2 P        | C26 H32 Cl2 I N2 P        |
| Mr             | 601.31                    | 601.31                    |
| Dx,g cm-3      | 1.433                     | 1.432                     |
| Z              | 4                         | 4                         |
| Mu (mm-1)      | 1.414                     | 1.414                     |
| F000           | 1216.0                    | 1216.0                    |
| F000'          | 1216.00                   |                           |
| h,k,lmax       | 13,23,17                  | 13,23,17                  |
| Nref           | 5694                      | 5683                      |
| Tmin,Tmax      | 0.749,0.893               | 0.661,0.885               |
| Tmin'          | 0.654                     |                           |

Correction method= MULTI-SCAN

Data completeness= 0.998 Theta(max)= 26.370

R(reflections)= 0.0288( 3596) wR2(reflections)= 0.0581( 5683)

S = 0.902 Npar= 293

---

The following ALERTS were generated. Each ALERT has the format  
**test-name\_ALERT\_alert-type\_alert-level**.  
Click on the hyperlinks for more details of the test.

---

### Alert level C

|                                                                   |   |
|-------------------------------------------------------------------|---|
| PLAT790_ALERT_4_C Centre of Gravity not Within Unit Cell: Resd. # | 2 |
| C H2 Cl2                                                          |   |
| PLAT790_ALERT_4_C Centre of Gravity not Within Unit Cell: Resd. # | 3 |
| I                                                                 |   |

---

● **Alert level G**

PLAT128\_ALERT\_4\_G Non-standard setting of Space-group P21/c .... P21/n  
PLAT180\_ALERT\_4\_G Check Cell Rounding: # of Values Ending with 0 = 3

---

0 **ALERT level A** = In general: serious problem  
0 **ALERT level B** = Potentially serious problem  
2 **ALERT level C** = Check and explain  
2 **ALERT level G** = General alerts; check

0 ALERT type 1 CIF construction/syntax error, inconsistent or missing data  
0 ALERT type 2 Indicator that the structure model may be wrong or deficient  
0 ALERT type 3 Indicator that the structure quality may be low  
4 ALERT type 4 Improvement, methodology, query or suggestion  
0 ALERT type 5 Informative message, check

---

**Publication of your CIF in IUCr journals**

**A basic structural check has been run on your CIF. These basic checks will be run on all CIFs submitted for publication in IUCr journals (*Acta Crystallographica*, *Journal of Applied Crystallography*, *Journal of Synchrotron Radiation*); however, if you intend to submit to *Acta Crystallographica Section C* or *E*, you should make sure that full publication checks are run on the final version of your CIF prior to submission.**

**Publication of your CIF in other journals**

**Please refer to the *Notes for Authors* of the relevant journal for any special instructions relating to CIF submission.**

---

**PLATON version of 13/08/2009; check.def file version of 12/08/2009**

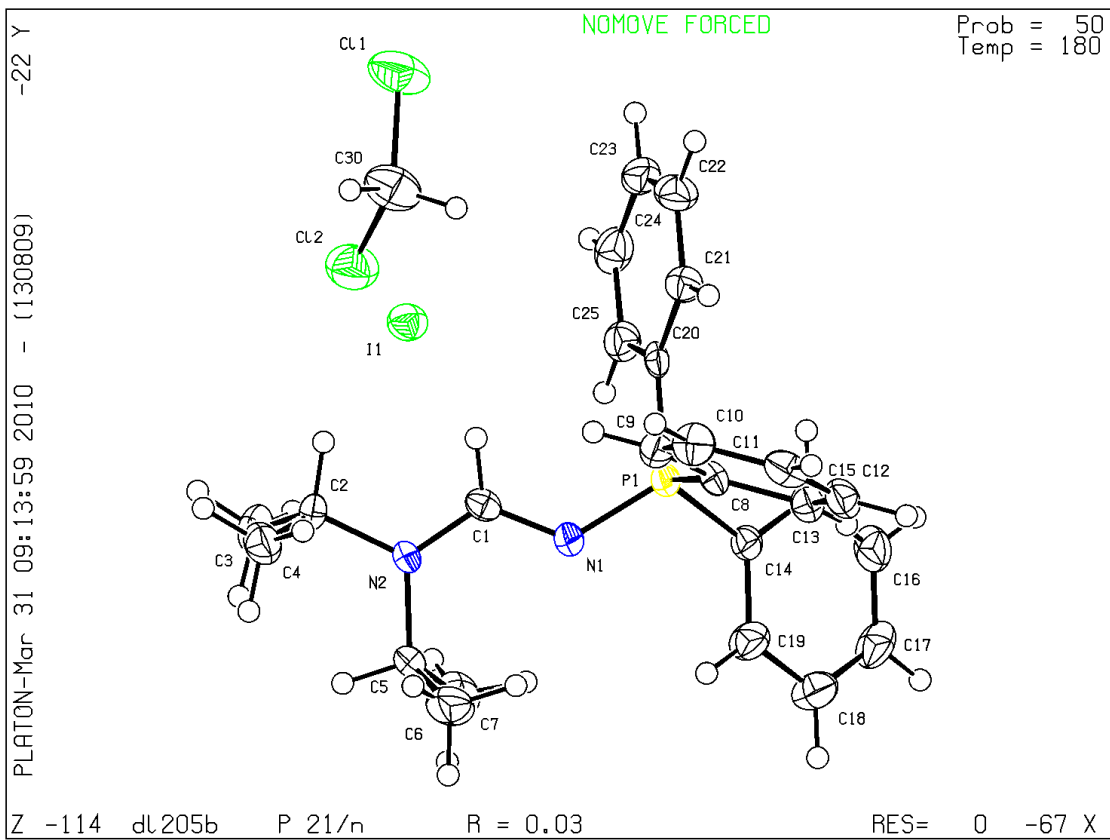

Supplement: mmc3 [file mmc3.pdf]
